# Supplementary material
Source: MDPI journal article supplement (https://www.mdpi.com/2071-1050/11/6/1604)
Supplement: s1 [file s1]

## Sheet: Detailed values for Figures 3-5
	Figure 3. Environmental impacts of pruning residues in a Polish apple orchard (theoretical pruning potential 1.39 tFM·ha−1).
		PtE Harvesting	PtE Transport	PtE Combustion	PtE Soil effects	Total PtE	PtS Mulching	PtS Soil effects	PtS Heat substitution	Total PtS
	Acidification - PtE	0.00547569	0.000417992	0.0492968	0.0683125	0.123503				0.256332
	Acidification - PtS						0.00439746	0.000348837	0.251586
	Climate change, excl biogenic carbon - PtE	0.00281996	0.000265618	0.00997831	0.00544772	0.0185116				0.185376
	Climate change, excl biogenic carbon - PtS						0.00272234	-0.000643167	0.183297
	Climate change, incl biogenic carbon - PtE	0.00277657	0.000250217	0.174773	0.00546952	0.183269				0.184183
	Climate change, incl biogenic carbon - PtS						0.00261388	-0.000643167	0.182213
	Ecotoxicity freshwater - PtE	0.00359268	0.00138627	0.0214943	0.0261098	0.0525831				0.667048
	Ecotoxicity freshwater - PtS						0.0138444	0.0181922	0.635011
	Eutrophication freshwater - PtE	0.00112838	0.00014973	0.000253311	2.73243e-05	0.00155874				0.349439
	Eutrophication freshwater - PtS						0.00281757	0	0.346622
	Eutrophication marine - PtE	0.00751479	0.000530059	0.0620432	0.0639567	0.134045				0.10842
	Eutrophication marine - PtS						0.0053432	0.056568	0.0465089
	Eutrophication terrestrial - PtE	0.00784091	0.000553239	0.066715	0.081865	0.156974				0.0505403
	Eutrophication terrestrial - PtS						0.00556818	0.000540341	0.0444318
	Human toxicity, cancer effects - PtE	0.0131707	0.00260276	0.0144092	0.0481382	0.0783209				1.98756
	Human toxicity, cancer effects - PtS						0.0498645	0.0217073	1.91599
	Human toxicity, non-cancer effects - PtE	0.0188387	0.0218097	0.143933	0.393333	0.577914				1.31015
	Human toxicity, non-cancer effects - PtS						0.0906386	0.257036	0.962477
	Ionizing radiation, human health - PtE	0.000793379	0.000137049	8.52684e-05	0.000679913	0.00169561				0.0293938
	Ionizing radiation, human health - PtS						0.00293363	0	0.0264602
	Land Use - PtE	0.000476694	0.000309378	0.00051706	5.33688e-05	0.0013565				0.0253357
	Land Use - PtS						0.00140523	0	0.0239305
	Ozone depletion - PtE	1.01882e-05	0.000309378	0.00051706	5.33688e-05	0.000889995				0.0239635
	Ozone depletion - PtS						3.30001e-05	0	0.0239305
	Particulate matter/Respiratory inorganics - PtE	0.0062391	0.000815842	0.043906	0.0188018	0.0697627				0.324851
	Particulate matter/Respiratory inorganics - PtS						0.00638753	4.23684e-05	0.318421
	Photochemical ozone formation, human health - PtE	0.0112353	0.000800351	0.0935969	0.00139186	0.107024				0.25434
	Photochemical ozone formation, human health - PtS						0.00852619	0.00070347	0.24511
	Figure 4. Influence of transport distance on environmental aspects of energetic use of pruning residues (theoretical pruning potential 1.39 tFM·ha−1).
		PtE Harvesting	PtE Transport	PtE Combustion	PtE Soil effects	Total PtE	PtS Mulching	PtS Soil effects	PtS Heat substitution	Total PtS
	Acidification - PtE (600 km)	0.00547569	0.0417992	0.0492968	0.0683125	0.164884
	Acidification - PtE (60 km)	0.00547569	0.00417992	0.0492968	0.0683125	0.127265
	Acidification - PtE (6 km)	0.00547569	0.000417992	0.0492968	0.0683125	0.123503
	Acidification - PtS						0.00439746	0.000348837	0.251586	0.256332
	Climate change, excl biogenic carbon - PtE (600 km)	0.00281996	0.0265618	0.00997831	0.00544772	0.0448078
	Climate change, excl biogenic carbon - PtE (60 km)	0.00281996	0.00265618	0.00997831	0.00544772	0.0209022
	Climate change, excl biogenic carbon - PtE (6 km)	0.00281996	0.000265618	0.00997831	0.00544772	0.0185116
	Climate change, excl biogenic carbon - PtS						0.00272234	-0.000643167	0.183297	0.185376
	Ecotoxicity freshwater - PtE (600 km)	0.00359268	0.138627	0.0214943	0.0261098	0.189824
	Ecotoxicity freshwater - PtE (60 km)	0.00359268	0.0138627	0.0214943	0.0261098	0.0650595
	Ecotoxicity freshwater - PtE (6 km)	0.00359268	0.00138627	0.0214943	0.0261098	0.0525831
	Ecotoxicity freshwater - PtS						0.0138444	0.0181922	0.635011	0.667048
	Eutrophication terrestrial - PtE (600 km)	0.00784091	0.0553239	0.066715	0.081865	0.211745
	Eutrophication terrestrial - PtE (60 km)	0.00784091	0.00553239	0.066715	0.081865	0.161953
	Eutrophication terrestrial - PtE (6 km)	0.00784091	0.000553239	0.066715	0.081865	0.156974
	Eutrophication terrestrial - PtS						0.00556818	0.000540341	0.0444318	0.0505403
	Particulate matter/Respiratory inorganics - PtE (600 km)	0.0062391	0.0815842	0.043906	0.0188018	0.150531
	Particulate matter/Respiratory inorganics - PtE (60 km)	0.0062391	0.00815842	0.043906	0.0188018	0.0771053
	Particulate matter/Respiratory inorganics - PtE (6 km)	0.0062391	0.000815842	0.043906	0.0188018	0.0697627
	Particulate matter/Respiratory inorganics - PtS						0.00638753	4.23684e-05	0.318421	0.324851
	Photochemical ozone formation, human health - PtE (600 km)	0.0112353	0.0800442	0.0935969	0.00139186	0.186268
	Photochemical ozone formation, human health - PtE (60 km)	0.0112353	0.00800442	0.0935969	0.00139186	0.114229
	Photochemical ozone formation, human health - PtE (6 km)	0.0112353	0.000800351	0.0935969	0.00139186	0.107024
	Photochemical ozone formation, human health - PtS						0.00852619	0.00070347	0.24511	0.25434
	Figure 5. Influence of boiler capacity on environmental aspects of energetic use of pruning residues (theoretical pruning potential 1.39 tFM·ha−1).
		PtE Harvesting	PtE Transport	PtE Combustion	PtE Soil effects	Total PtE	PtS Mulching	PtS Soil effects	PtS Heat substitution	Total PtS
	Acidification - PtE (50 kW)	0.00547569	0.000417992	0.0492968	0.0683125	0.123503
	Acidification - PtS (1-10 MW)						0.00439746	0.000348837	0.266385	0.271131
	Acidification - PtS (50 kW)						0.00439746	0.000348837	0.251586	0.256332
	Climate change, excl biogenic carbon - PtE (50 kW)	0.00281996	0.000265618	0.00997831	0.00544772	0.0185116
	Climate change, excl biogenic carbon - PtS (1-10 MW)						0.00272234	-0.000643167	0.161605	0.163684
	Climate change, excl biogenic carbon - PtS (50 kW)						0.00272234	-0.000643167	0.183297	0.185376
	Ecotoxicity freshwater - PtE (50 kW)	0.00359268	0.00138627	0.0214943	0.0261098	0.0525831
	Ecotoxicity freshwater - PtS (1-10 MW)						0.0138444	0.0181922	0.546911	0.578947
	Ecotoxicity freshwater - PtS (50 kW)						0.0138444	0.0181922	0.635011	0.667048
	Eutrophication terrestrial - PtE (50 kW)	0.00784091	0.000553239	0.066715	0.081865	0.156974
	Eutrophication terrestrial - PtS (1-10 MW)						0.00556818	0.000540341	0.0863636	0.0924722
	Eutrophication terrestrial - PtS (50 kW)						0.00556818	0.000540341	0.0444318	0.0505403
	Particulate matter/Respiratory inorganics - PtE (50 kW)	0.0062391	0.000815842	0.043906	0.0188018	0.0697627
	Particulate matter/Respiratory inorganics - PtS (1-10 MW)						0.00638753	4.23684e-05	0.212632	0.219061
	Particulate matter/Respiratory inorganics - PtS (50 kW)						0.00638753	4.23684e-05	0.318421	0.324851
	Photochemical ozone formation, human health - PtE (50 kW)	0.0112353	0.000800351	0.0935969	0.00139186	0.107024
	Photochemical ozone formation, human health - PtS (1-10 MW)						0.00852619	0.00070347	0.138486	0.147715
	Photochemical ozone formation, human health - PtS (50 kW)						0.00852619	0.00070347	0.24511	0.25434
